# Supplementary material for: Evaluation of Commercial Anti-SARS-CoV-2 Neutralizing Antibody Assays in seropositive subjects
Source: bioRxiv or medRxiv preprint supplement (doi:10.1101/2022.01.04.22268652), 2022-04-01

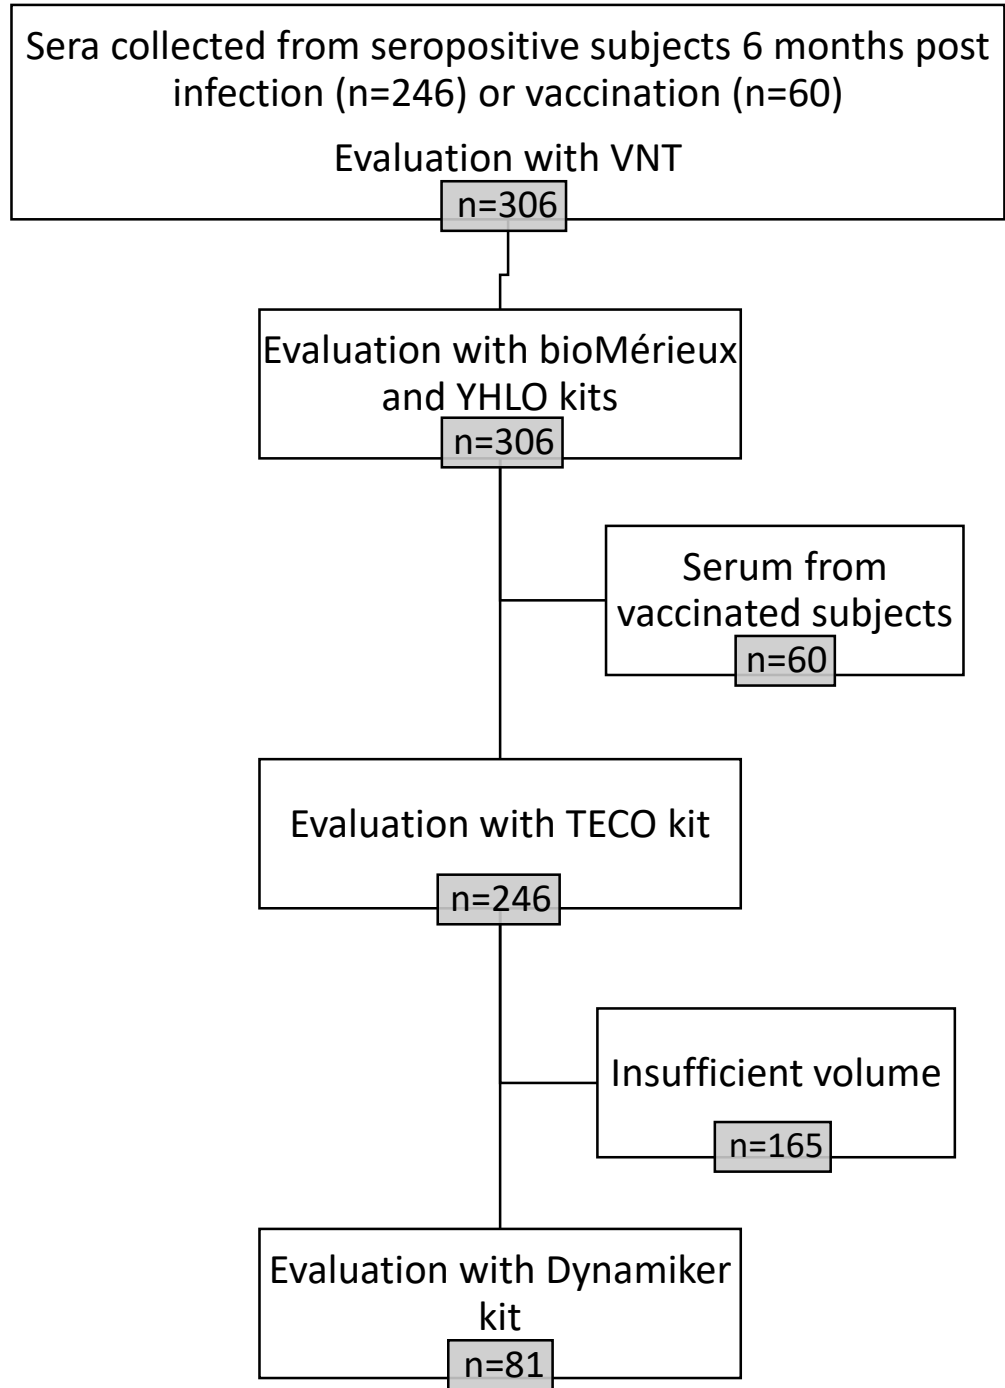

Supplement: Supplementary file [file media-1.pdf]
